# Supplementary material
Source: MDPI journal article supplement (https://www.mdpi.com/2073-4441/14/11/1801)
Supplement: s1 [file s1]

# **Ecotoxicological consequences of the abatement of contaminants of emerging concern by ozonation – does mixture complexity matter?**

Fátima Jesus<sup>1</sup>, Carla Bernardo<sup>2</sup>, Rui C. Martins<sup>2</sup>, João Gomes<sup>2</sup>, Joana L. Pereira

<sup>1</sup> CESAM - Centre for Environmental and Marine Studies, Department of Environment and Planning, University of Aveiro, Campus de Santiago, 3810-193 Aveiro, Portugal

<sup>2</sup> CIEPQPF – Chemical Engineering Processes and Forest Products Research Center, Department of Chemical Engineering, Faculty of Sciences and Technology, University of Coimbra - Pólo II, Rua Sílvio Lima, 3030-790 Coimbra, Portugal

<sup>3</sup> CESAM - Centre for Environmental and Marine Studies, Department of Biology, University of Aveiro, Campus de Santiago, 3810-193 Aveiro, Portugal

## **Corresponding author**

Fátima Jesus (fatima.jesus@ua.pt)

## **SUPPLEMENTARY MATERIAL**

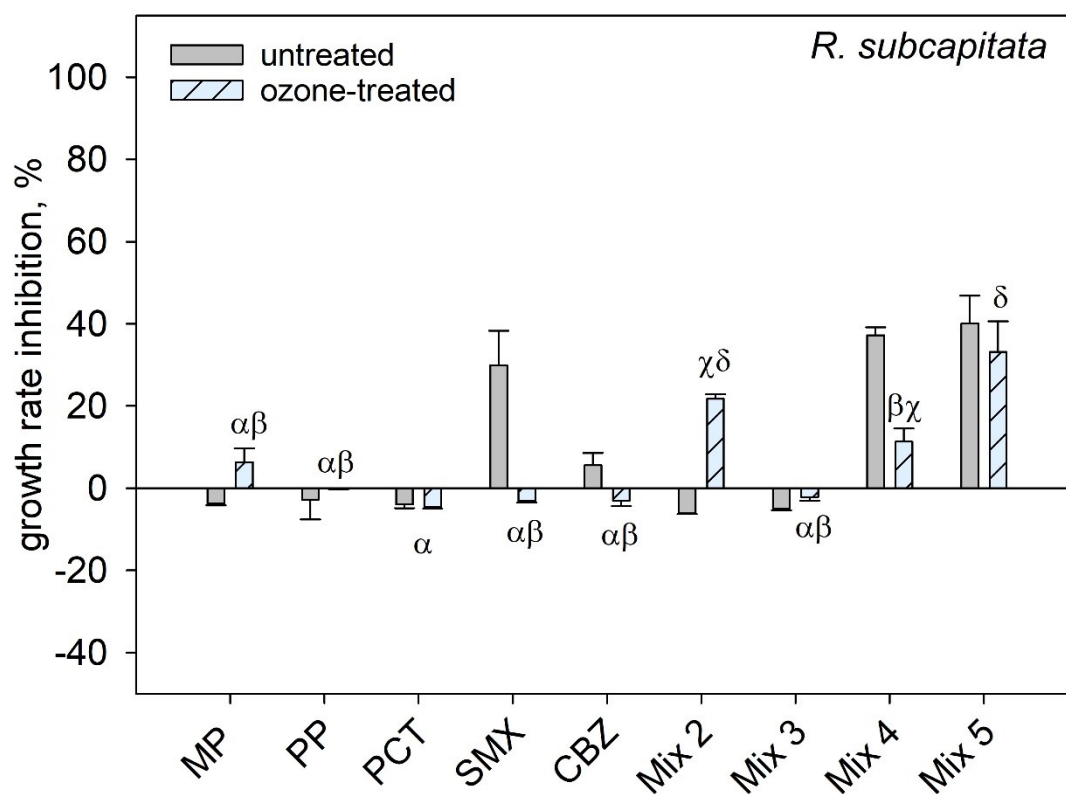

Figure S1: Growth rate inhibition of *Raphidocelis subcapitata* after 96 h of exposure to untreated and ozone-treated solutions. The bars represent the mean and the error bars represent the standard error of the mean. Mix 2: MP+PP; Mix 3: MP+PP+PCT; Mix 4: MP+PP+PCT+SMX; Mix 5: MP+PP+PCT+SMX+CBZ. Different Latin letters indicate significant differences among untreated samples; different Greek letters indicate significant differences among ozone-treated samples.

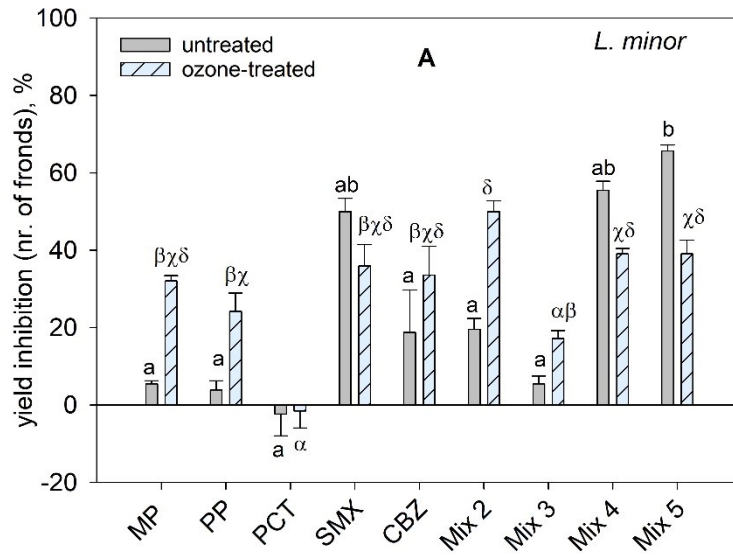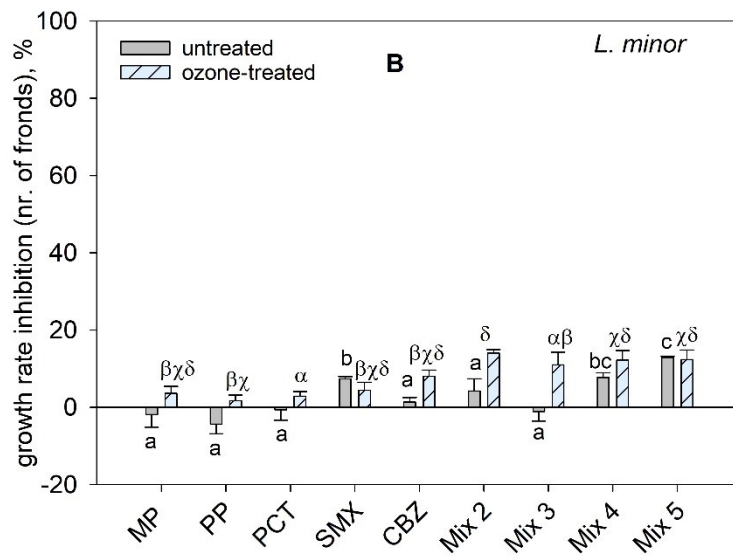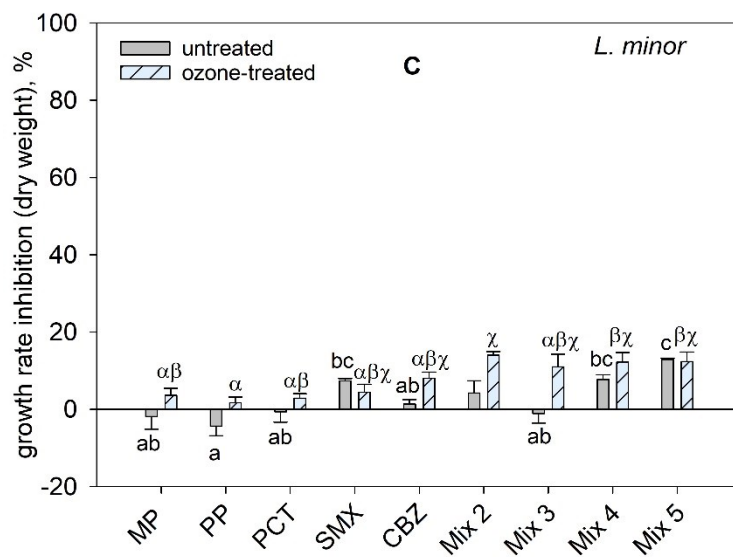

Figure S2 – Ecotoxicological responses of *Lemna minor* after 7d of exposure to untreated and ozone-treated solutions, expressed as: yield inhibition as a function of the number of fronds (A); growth rate inhibition as a function of dry weight (B); growth rate inhibition as a function of the number of fronds (C). The bars represent the mean and the error bars represent the standard error of the mean. Mix 2: MP+PP; Mix 3: MP+PP+PCT; Mix 4: MP+PP+PCT+SMX; Mix 5: MP+PP+PCT+SMX+CBZ. Different Latin letters indicate significant differences among untreated samples; different Greek letters indicate significant differences among ozone-treated samples.

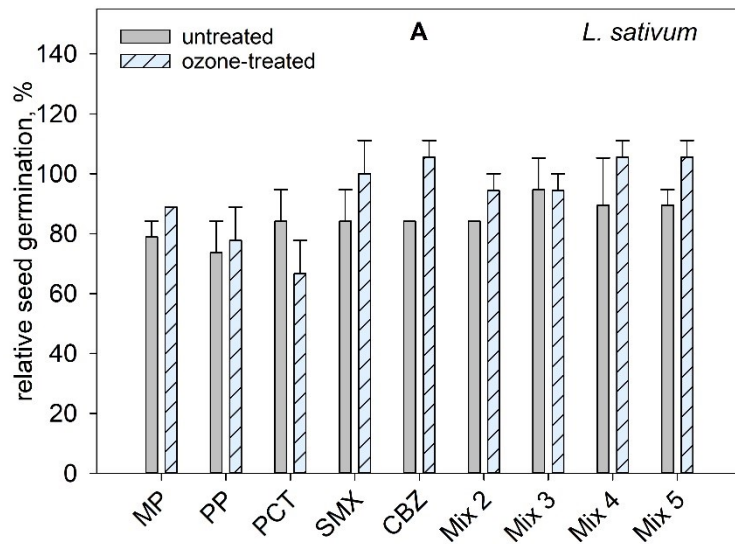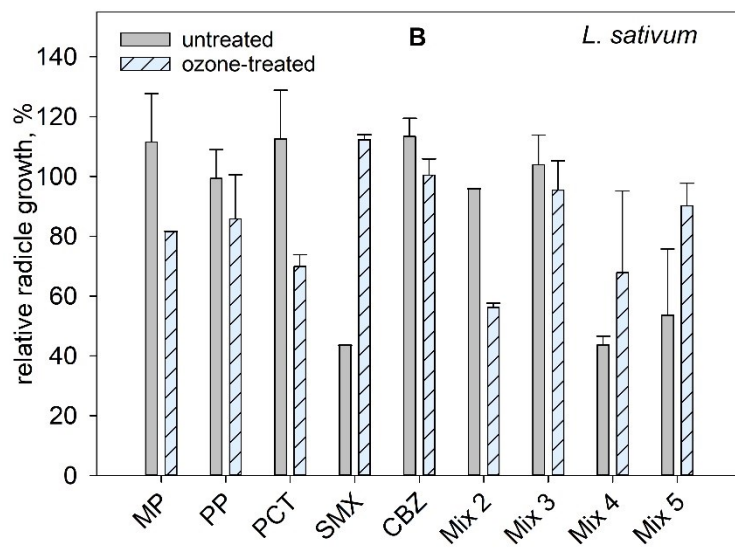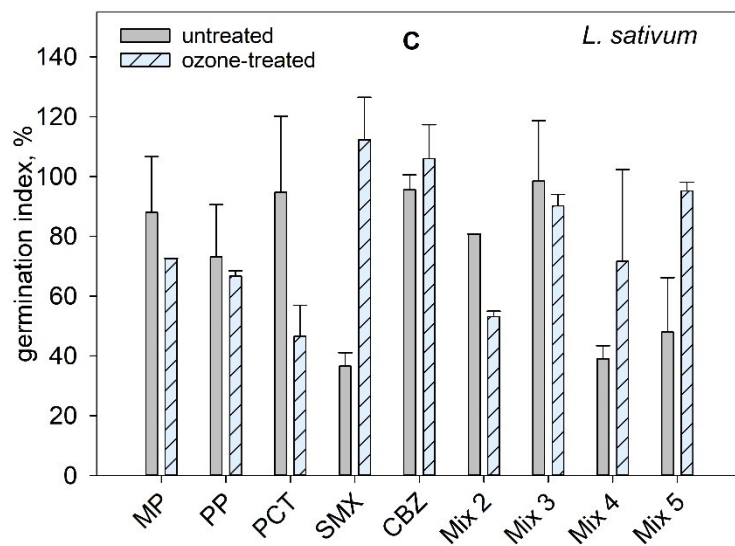

Figure S3 – Ecotoxicological responses of *Lepidium sativum* after 48h of exposure to untreated and ozone-treated solutions, expressed as: relative seed germination (RSG; A); relative radicle growth (RRG; B) and germination index (GI, C). The bars represent the mean and the error bars represent the standard error of the mean. Mix 2: MP+PP; Mix 3: MP+PP+PCT; Mix 4: MP+PP+PCT+SMX; Mix 5: MP+PP+PCT+SMX+CBZ. No statistically significant differences among untreated samples and ozone-treated samples were observed.
